# Supplementary material for: Prevalence and risk factors for asymptomatic malaria and genotyping of glucose 6-phosphate (G6PD) deficiencies in a vivax-predominant setting, Lao PDR: implications for sub-national elimination goals
Source: Springer Nature journal article supplement (doi:10.1186/s12936-018-2367-5), 2018-06-01
Supplement: MOESM1 [file 15812432]

**Additional file 1.**

Detailed population characteristics, malaria parasite and risk-factor survey,  
Northern Lao PDR (N= 5,082) (Part 1).

| <b>characteristic</b>             | <b>n</b>                               | <b>% of total (95% CI)</b> |
|-----------------------------------|----------------------------------------|----------------------------|
| <b>Sex</b>                        | male                                   | 2,380                      |
|                                   | female                                 | 2,702                      |
| <b>Age</b>                        | 0-9                                    | 830                        |
|                                   | 10-19                                  | 1,022                      |
|                                   | 20-29                                  | 909                        |
|                                   | 30-39                                  | 788                        |
|                                   | 40-49                                  | 636                        |
|                                   | 50-59                                  | 515                        |
|                                   | 60+                                    | 382                        |
|                                   | <b>District</b>                        | Paktha                     |
| Muang Et                          |                                        | 1,442                      |
| Nambak                            |                                        | 1,219                      |
| Khua                              |                                        | 1,383                      |
| <b>Education</b>                  | No schooling                           | 1,102                      |
|                                   | Some primary                           | 1,996                      |
|                                   | Completed primary (grade 5)            | 709                        |
|                                   | Some secondary                         | 896                        |
|                                   | Completed secondary (grade 11 or 12)   | 267                        |
|                                   | More than secondary                    | 112                        |
| <b>Primary occupation</b>         | Small-scale farmer                     | 2,014                      |
|                                   | Student                                | 1,391                      |
|                                   | Not of working age/homemaker           | 1,102                      |
|                                   | Manual labor                           | 216                        |
|                                   | Plantation work (for cash)             | 130                        |
|                                   | Small business owner                   | 84                         |
|                                   | Not working                            | 81                         |
|                                   | Teacher                                | 58                         |
|                                   | Collecting plants or hunting in forest | 6                          |
| <b>Household residency status</b> | Visitor                                | 10                         |

|                                                                                       |             |       |                      |
|---------------------------------------------------------------------------------------|-------------|-------|----------------------|
|                                                                                       | Resident    | 5,072 | 99.8 (99.6 to 99.9)  |
| <b>Wealth quintile</b>                                                                | Highest     | 1,126 | 22.2 (18.2 to 26.7)  |
|                                                                                       | Middle high | 1,238 | 24.4 (20.9 to 28.2)  |
|                                                                                       | Middle low  | 1,288 | 25.3 (21.9 to 29.1)  |
|                                                                                       | Lowest      | 1,430 | 28.1 (22.0 to 35.2)  |
| <b>Resident of household with ownership of bednet (any type)</b>                      | No          | 22    | 0.43 (0.013 to 0.15) |
|                                                                                       | Yes         | 5,060 | 99.6 (98.5 to 99.9)  |
| <b>Resident of household with at least one treated bednet for every two residents</b> | No          | 2,368 | 46.6 (40.5 to 52.8)  |
|                                                                                       | Yes         | 2,692 | 53.0 (46.7 to 59.2)  |

Detailed population characteristics, malaria parasite and risk-factor survey,  
Northern Lao PDR (N= 5,082) (Part 2).

| characteristic                                                                           |            | n     | % of total (95% CI) |
|------------------------------------------------------------------------------------------|------------|-------|---------------------|
| <b>Resident of household with any forest-goers</b>                                       | No         | 3,172 | 62.4 (56.5 to 68.0) |
|                                                                                          | Yes        | 1,970 | 37.6 (32.0 to 43.5) |
| <b>Resident of household where source of malaria information is brochures or posters</b> | No         | 5,056 | 99.5 (98.8 to 99.8) |
| <b>Have you ever heard of malaria?</b>                                                   | Yes        | 3,702 | 72.9 (68.9 to 76.5) |
|                                                                                          | No         | 1,286 | 25.3 (21.6 to 29.4) |
|                                                                                          | Don't know | 94    | 1.9 (1.2 to 2.8)    |
| <b>Presence of other PCR-positives in village, but not in household</b>                  | No         | 4,178 | 82.2 (73.8 to 88.4) |

|                                                       |                      |       |                     |
|-------------------------------------------------------|----------------------|-------|---------------------|
|                                                       | Yes                  | 904   | 17.8 (11.6 to 26.2) |
| <b>Presence of other cases in household</b>           | No                   | 4,973 | 97.9 (96.2 to 98.8) |
|                                                       | Yes                  | 109   | 2.1 (1.2 to 3.8)    |
| <b>Mosquito nets (any type) per household</b>         | mean                 | -     | 4.3 (4.2 to 4.5)    |
|                                                       | range                | -     | 1 to 14             |
|                                                       | person per net ratio | -     | 1.5 (1.4 to 1.6)    |
| <b>Treated mosquito nets (any type) per household</b> | mean                 | -     | 2.6                 |
|                                                       | range                | -     | 0 to 12             |
|                                                       | person per net ratio | -     | 1.9 (1.7 to 2.0)    |
