# Supplementary material for: Prevalence and risk factors for asymptomatic malaria and genotyping of glucose 6-phosphate (G6PD) deficiencies in a vivax-predominant setting, Lao PDR: implications for sub-national elimination goals
Source: Springer Nature journal article supplement (doi:10.1186/s12936-018-2367-5), 2018-06-01
Supplement: MOESM3 [file 15812432]

Additional file 3: Multivariable Firth penalized-likelihood logistic model for PCR-based malaria parasite positivity (all species), Northern Lao PDR (N= 5,082).  
Note: risk factors with p < 0.05 are in boldface; HH= household.

| Risk factor                                                      |                           | aOR          | [95% Conf. Interval] | p-value           |
|------------------------------------------------------------------|---------------------------|--------------|----------------------|-------------------|
| District                                                         | Paktha                    | reference    | -                    | -                 |
|                                                                  | Muang Et                  | 1.70         | 0.51 to 5.65         | 0.386             |
|                                                                  | Nambak                    | 0.33         | 0.070 to 1.61        | 0.171             |
|                                                                  | Khua                      | 1.74         | 0.63 to 4.75         | 0.282             |
| Wealth quantile                                                  | highest                   | reference    | -                    | -                 |
|                                                                  | middle high               | 2.11         | 0.58 to 7.61         | 0.254             |
|                                                                  | middle low                | 1.59         | 0.41 to 6.11         | 0.499             |
|                                                                  | lowest                    | 3.38         | 0.95 to 12.00        | 0.060             |
| Does HH own any type of net (bednet or hammock) to sleep under?  | Yes                       | reference    | -                    | -                 |
|                                                                  | <b>No</b>                 | <b>10.32</b> | <b>2.07 to 51.53</b> | <b>0.004</b>      |
| Have you ever heard of malaria?                                  | Yes                       | reference    | -                    | -                 |
|                                                                  | No                        | 0.73         | 0.32 to 1.65         | 0.447             |
|                                                                  | <b>Don't know</b>         | <b>4.21</b>  | <b>1.06 to 16.78</b> | <b>0.041</b>      |
| Source of malaria knowledge                                      | Not brochure or poster    | reference    | -                    | -                 |
|                                                                  | <b>Brochure or poster</b> | <b>14.05</b> | <b>2.04 to 96.96</b> | <b>0.007</b>      |
| Does anyone in HH go to forest or forest-fringe sites overnight? | No                        | reference    | -                    | -                 |
|                                                                  | Yes                       | 1.74         | 0.71 to 4.26         | 0.222             |
| Any cases in village outside household?                          | No                        | reference    | -                    | -                 |
|                                                                  | <b>Yes</b>                | <b>2.99</b>  | <b>1.37 to 6.52</b>  | <b>0.006</b>      |
| Any other cases in household?                                    | No                        | reference    | -                    | -                 |
|                                                                  | <b>Yes</b>                | <b>12.04</b> | <b>4.97 to 29.19</b> | <b>&lt; 0.001</b> |
| Sex                                                              | male                      | reference    | -                    | -                 |
|                                                                  | female                    | 1.18         | 0.61 to 2.27         | 0.632             |
| Age in years                                                     | continuous                | 0.996        | 0.98 to 1.01         | 0.652             |
